# Supplementary material for: Design and synthesis of acetaminophen probe APAP-P1 for identification of the toxicity targets thioredoxin reductase-1 in HepaRG cells
Source: Royal Society of Chemistry journal article supplement (doi:10.1039/c9ra00483a), 2019-01-01
Supplement: c9ra00483a1.pdf [file c9ra00483a1.pdf]

# Design and Synthesis of Acetaminophen probe APAP-P1 for identification of the toxicity targets Thioredoxin Reductase-1 identification in HepaRG cells

Shan Wang<sup>‡</sup>, Yu Tian<sup>‡</sup>, Shan Lu, Ruiying Wang, Hai Shang, Xuelian Zhang, Chengyang Zhang, Guibo Sun\*, Xudong Xu\*, and Xiaobo Sun\*

Beijing Key Laboratory of Innovative Drug Discovery of Traditional Chinese Medicine (Natural Medicine) and Translational Medicine, Institute of Medicinal Plant Development, Chinese Academy of Medical Sciences & Peking Union Medical College, Beijing, 100193, P. R. China.

<sup>‡</sup>These authors contributed equally to this work.

\*Correspondence authors: E-mail addresses: [xdxu@implad.ac.cn](mailto:xdxu@implad.ac.cn) (XuDong Xu), [gbsun@implad.ac.cn](mailto:gbsun@implad.ac.cn) (Guibo Sun), [sun\\_xiaobo163@163.com](mailto:sun_xiaobo163@163.com) (Xiaobo Sun). Tel: +86-010-57833013; Fax: +86-010-57833013.

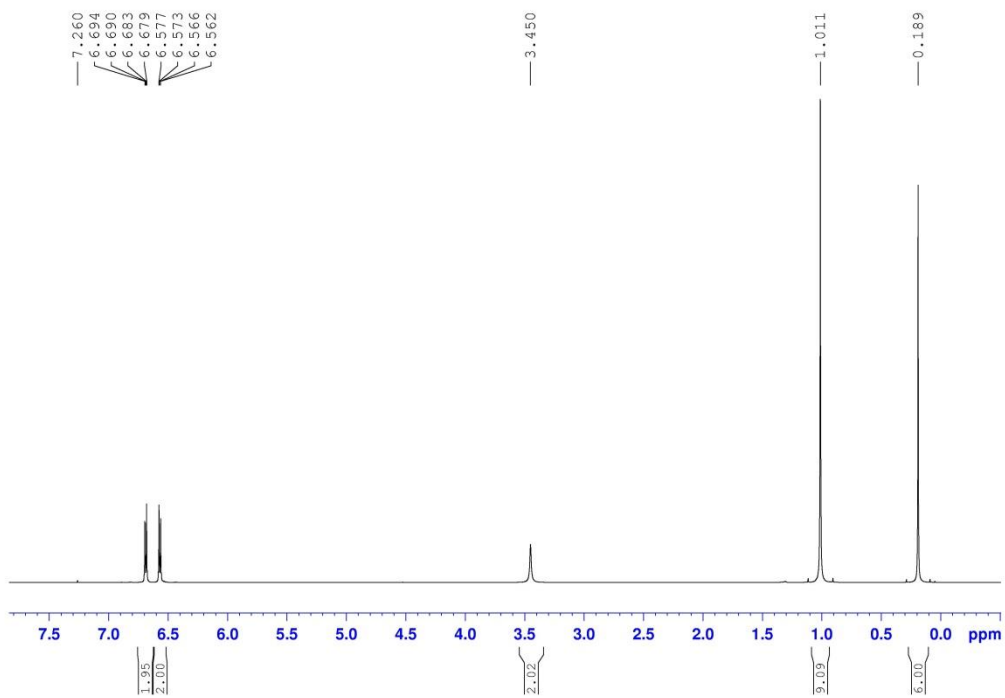

$^1\text{H}$  NMR of compound **2**

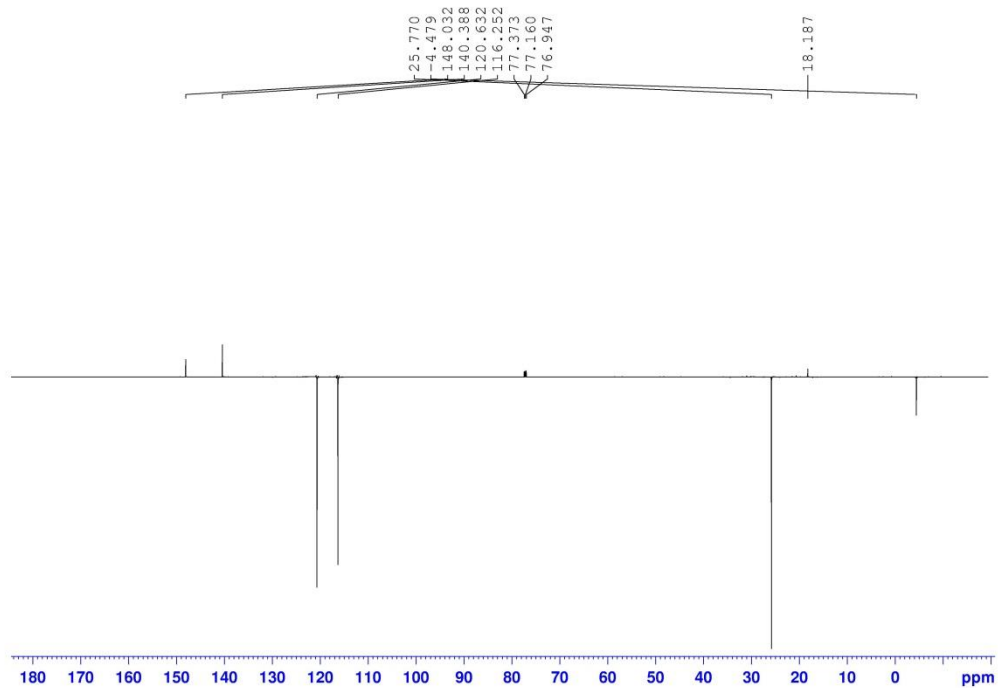

$^{13}\text{C}$  NMR of compound **2**

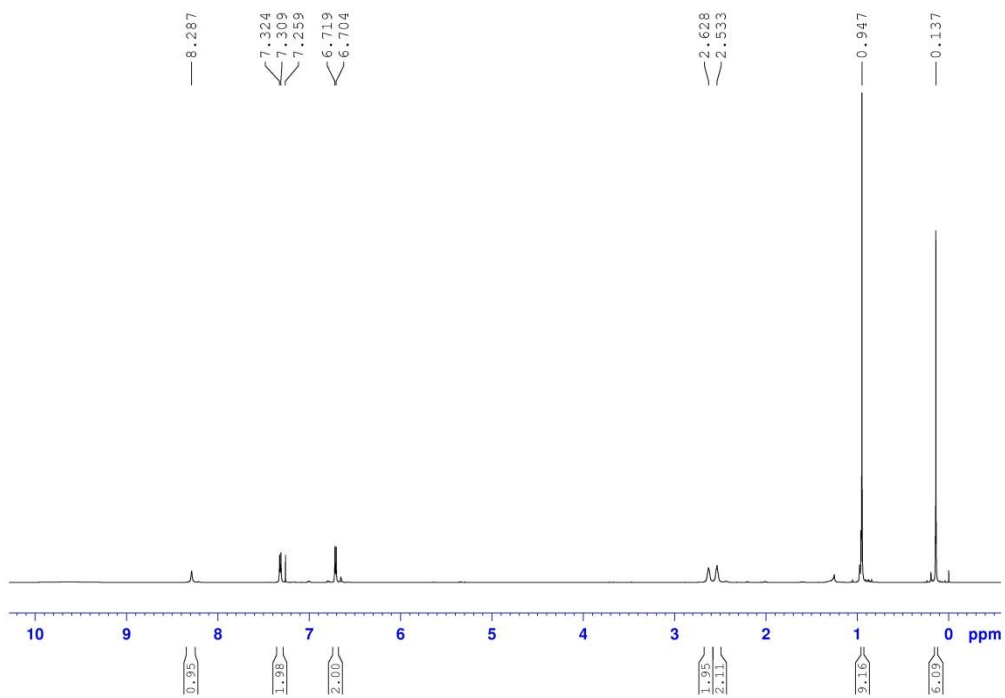

$^1\text{H}$  NMR of compound **3**

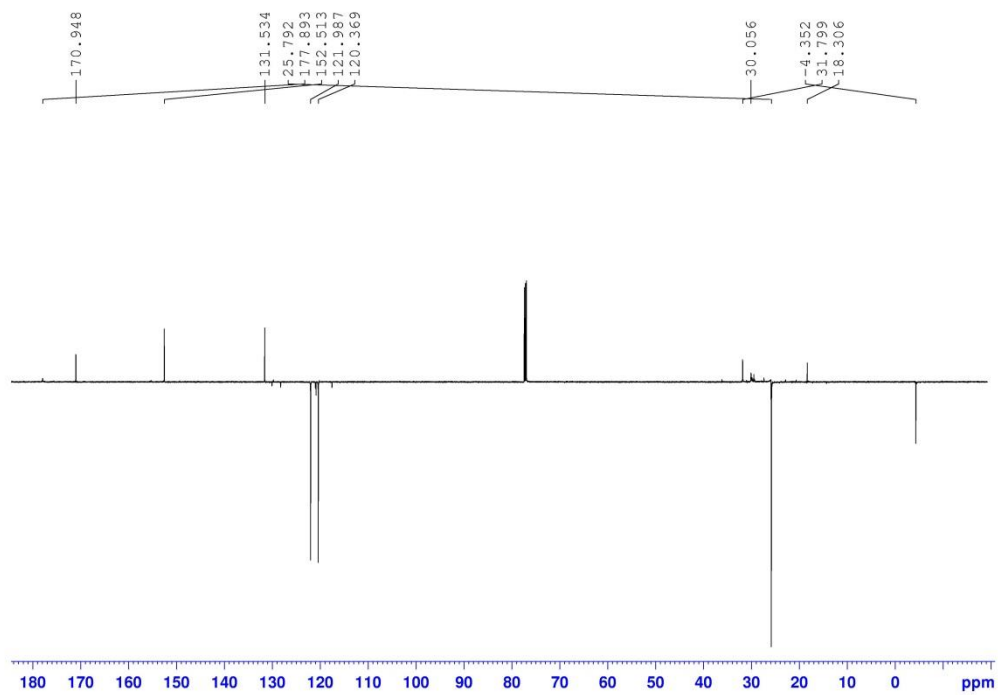

$^{13}\text{C}$  NMR of compound **3**

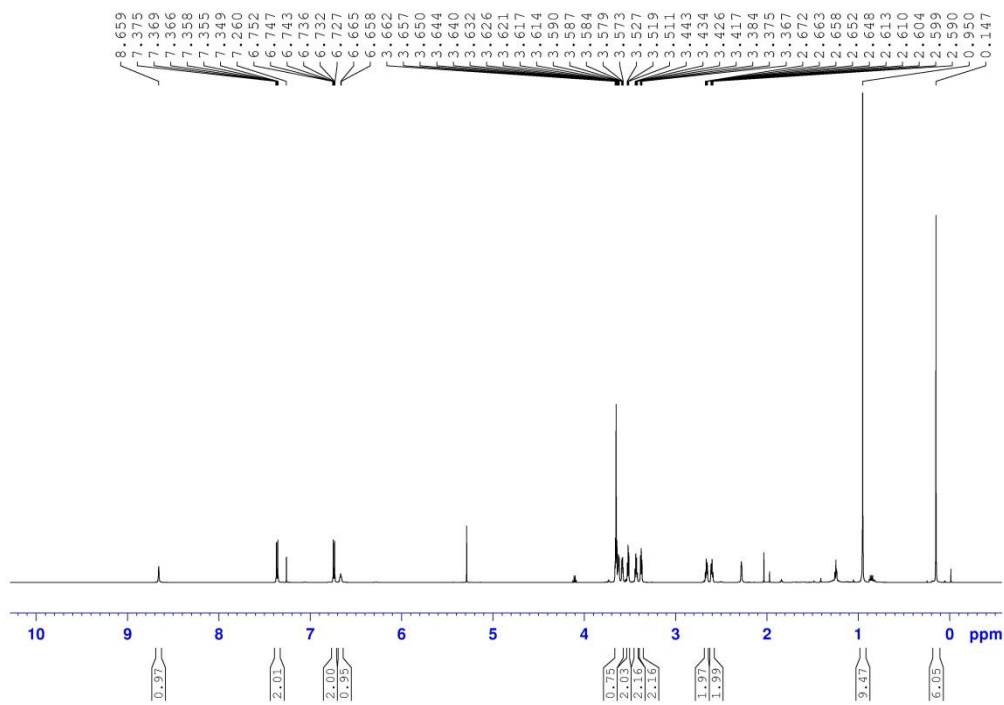

$^1\text{H}$  NMR of compound 4

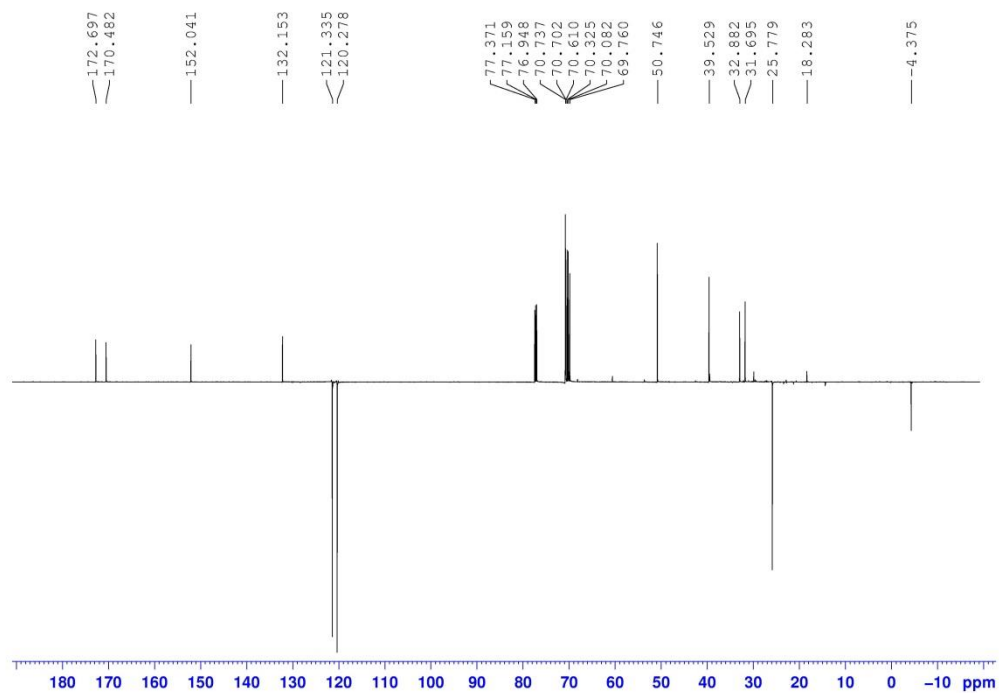

$^{13}\text{C}$  NMR of compound 4

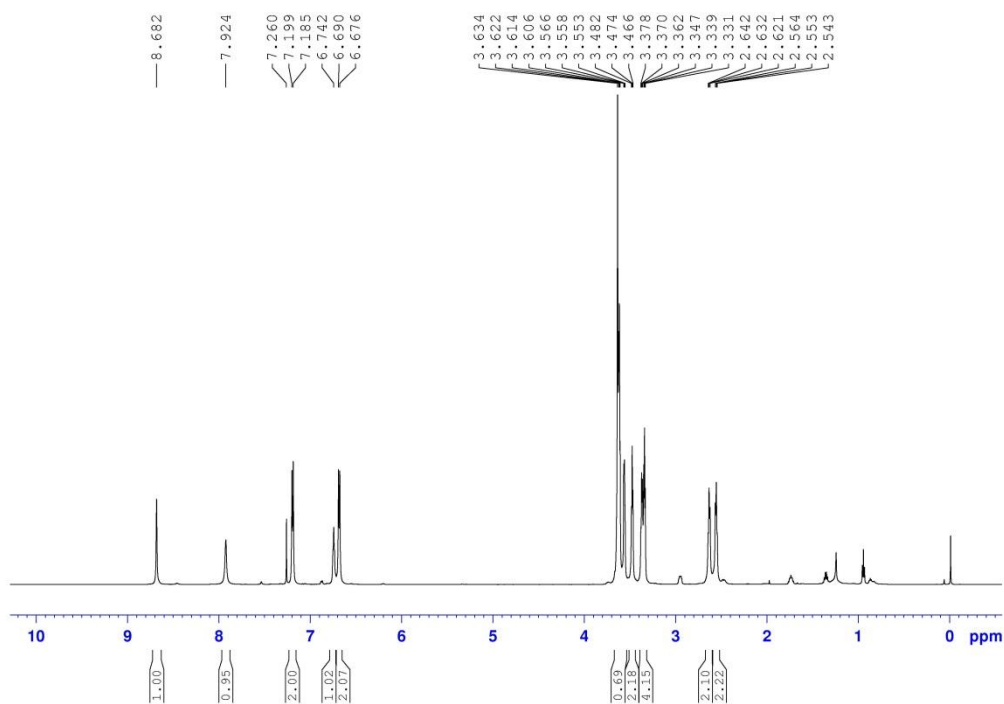

<sup>1</sup>H NMR of compound APAP-P1

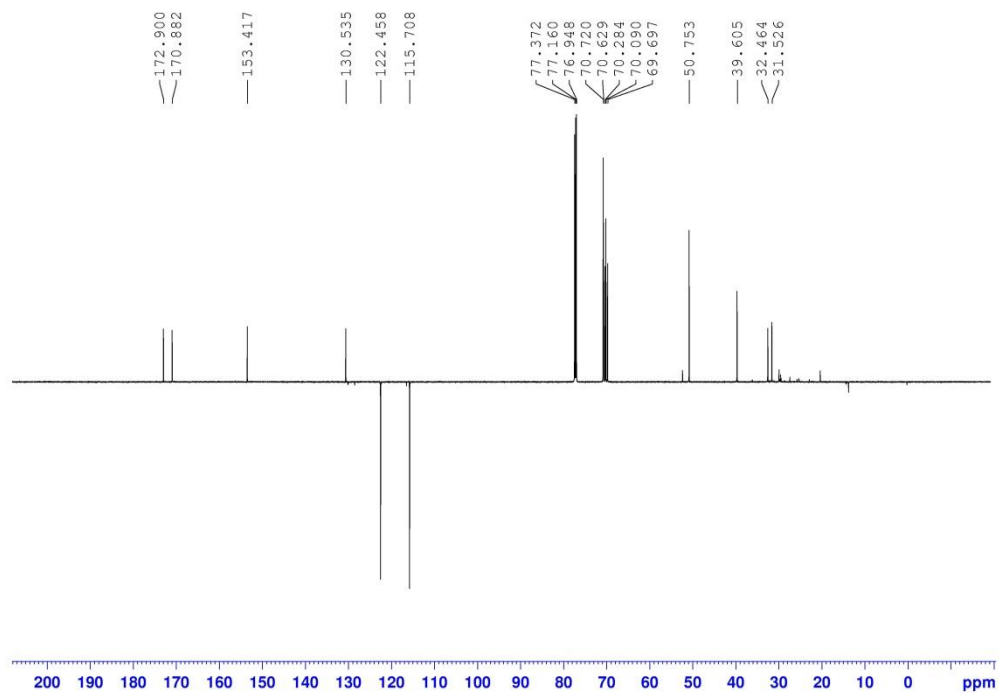

<sup>13</sup>C NMR of compound APAP-P1

WBQ-2-F\_180625131810 #3 RT: 0.02 AV: 1 NL: 2.16E8  
T: FTMS + p ESI Full ms [200.00-500.00]

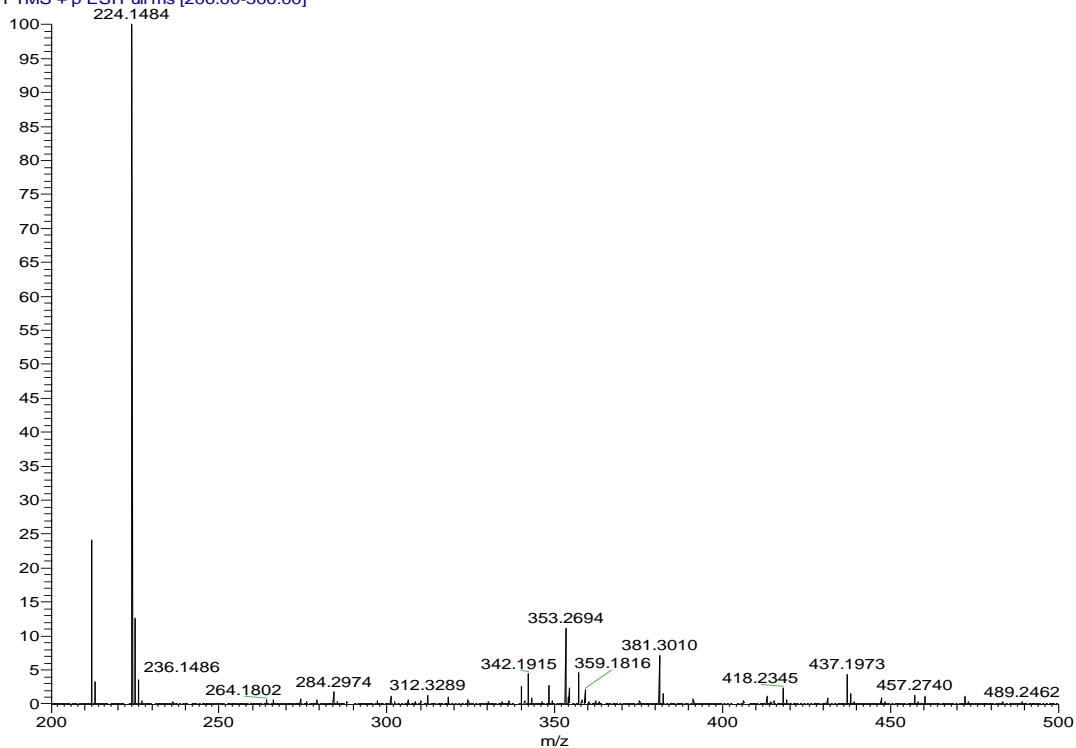

HRMS of compound 2

WBQ-7-F\_180625131810 #8 RT: 0.06 AV: 1 NL: 1.04E8  
T: FTMS + p ESI Full ms [200.00-650.00]

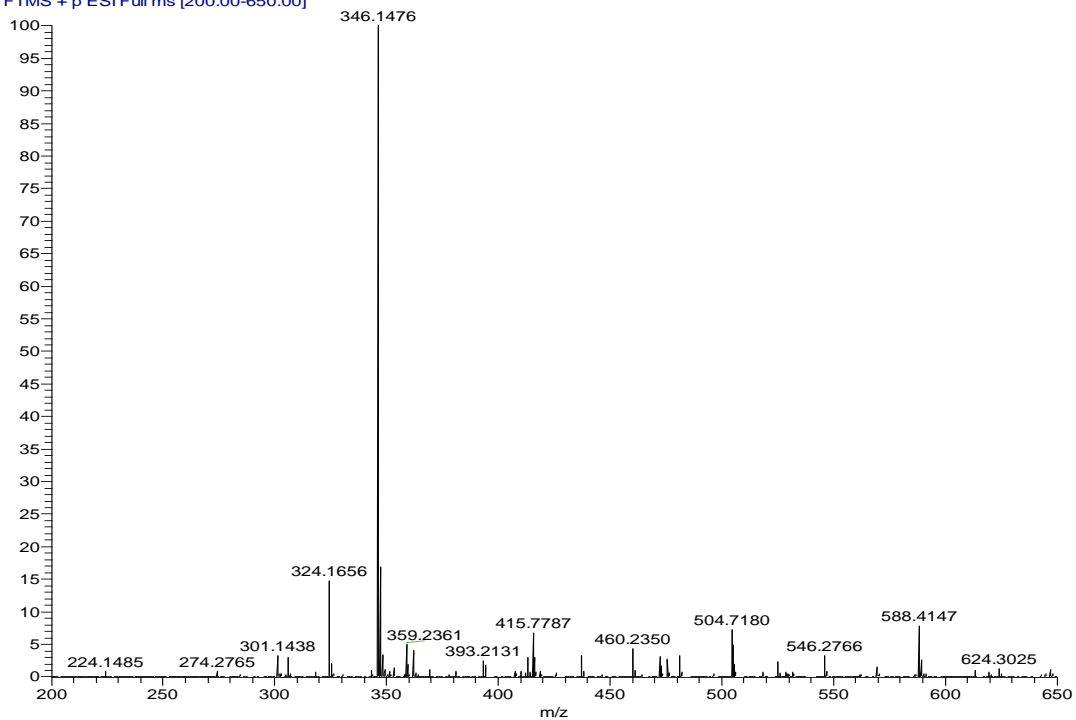

HRMS of compound 3

WBQ-9-F\_180625131810 #7 RT: 0.05 AV: 1 NL: 6.24E8  
T: FTMS + p ESI Full ms [200.00-1100.00]

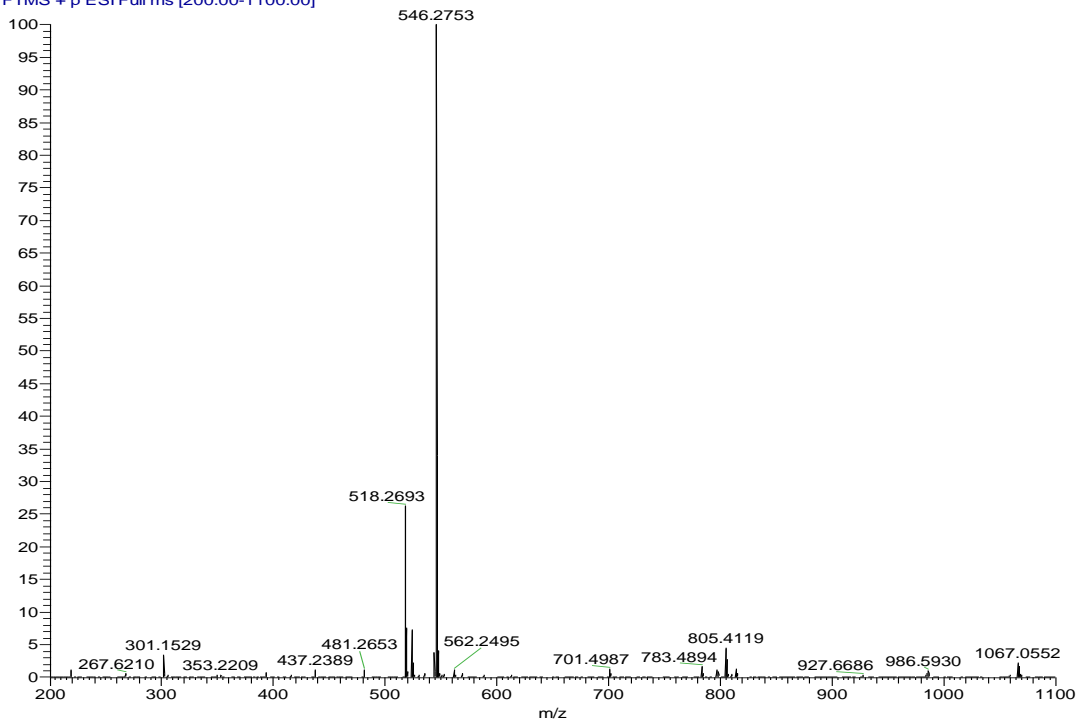

HRMS of compound 4

WBQ-10-F\_180503161403 #1 RT: 0.01 AV: 1 NL: 1.82E5  
T: FTMS + p ESI Full ms [405.00-900.00]

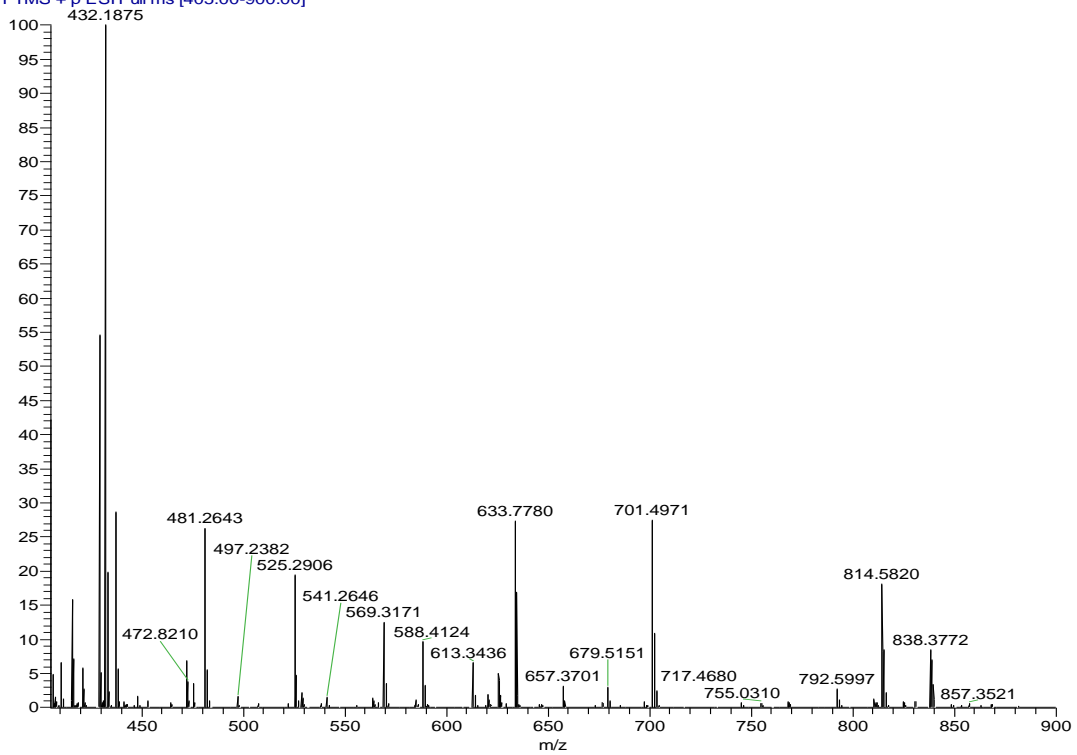

HRMS of compound APAP-P1
